# Supplementary material for: De-ageing of 1-3 piezocomposites by thermal cycling and degradation due to encapsulation
Source: Research Square preprint supplement (doi:10.21203/rs.3.rs-7417176/v1), 2025-09-12

De-ageing of 1-3 piezocomposites by thermal cycling and degradation due to encapsulation

R. Ramesh*, T.K. Vinod Kumar, R. Rajeswari and N.R. Manoj

Naval Physical & Oceanographic Laboratory, Kochi – 682 021, India

Supplementary data

**Supplementary data**

Fig.S1. Magnitude (|Z|) and Phase (φ) of electrical impedance of a piezocomposite sample. Markers : Experimental data and Solid lines : Theoretical curves plotted with refined material parameters, for N = 0.


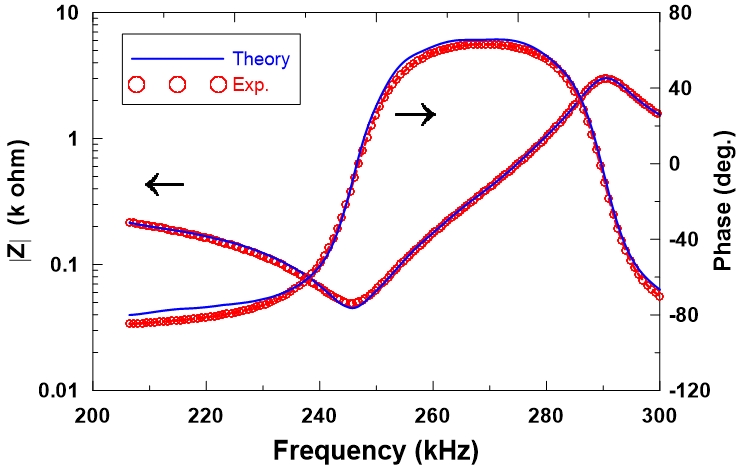


Fig.S2. Magnitude (|Z|) and Phase (φ) of electrical impedance of a piezocomposite sample. Markers : Experimental data and Solid lines : Theoretical curves plotted with refined material parameters, for N = 0.5


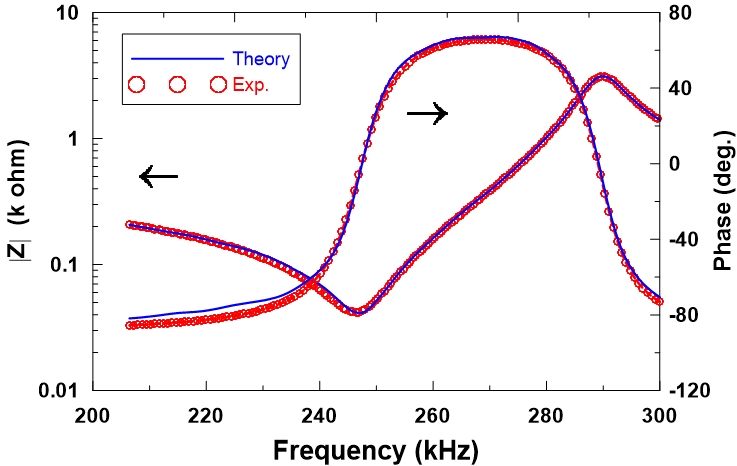


Fig.S3. Magnitude (|Z|) and Phase (φ) of electrical impedance of a piezocomposite sample. Markers : Experimental data and Solid lines : Theoretical curves plotted with refined material parameters, for N = 1.


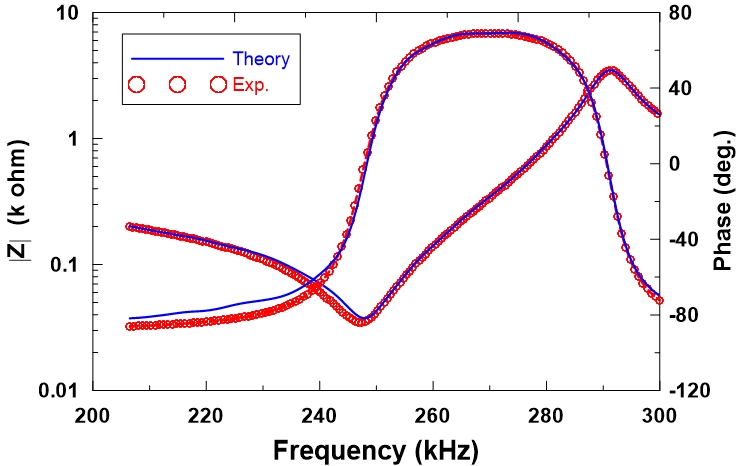


Fig.S4. Magnitude (|Z|) and Phase (φ) of electrical impedance of a piezocomposite sample. Markers : Experimental data and Solid lines : Theoretical curves plotted with refined material parameters, for N = 2.


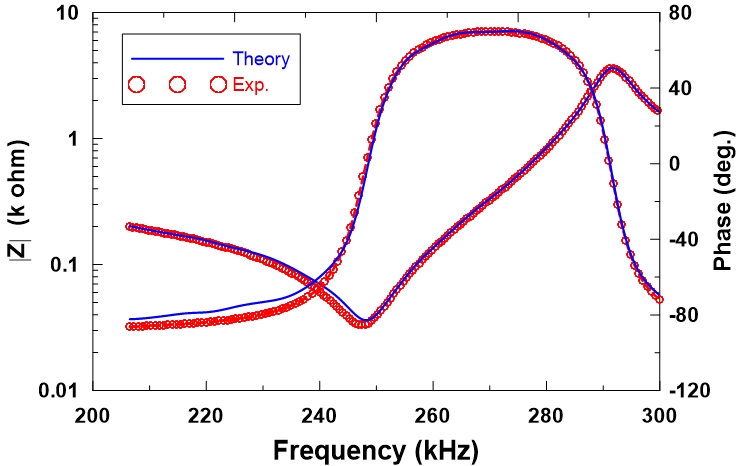


Fig.S5. Magnitude (|Z|) and Phase (φ) of electrical impedance of a piezocomposite sample. Markers : Experimental data and Solid lines : Theoretical curves plotted with refined material parameters, for N = 3.


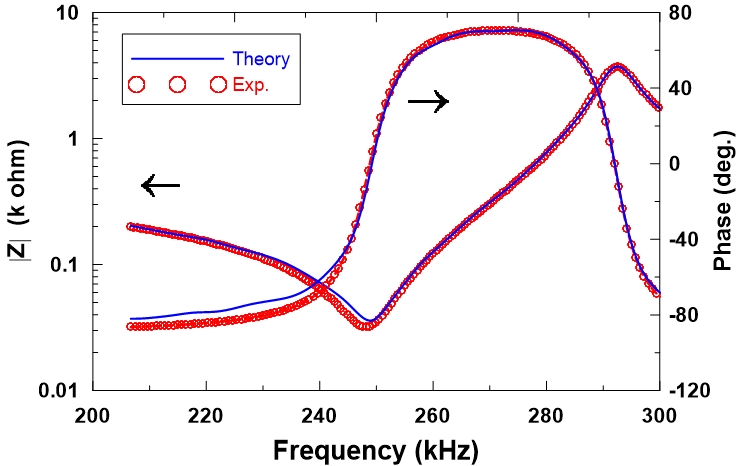


Fig.S6. Magnitude (|Z|) and Phase (φ) of electrical impedance of a piezocomposite sample. Markers : Experimental data and Solid lines : Theoretical curves plotted with refined material parameters, for N = 4.


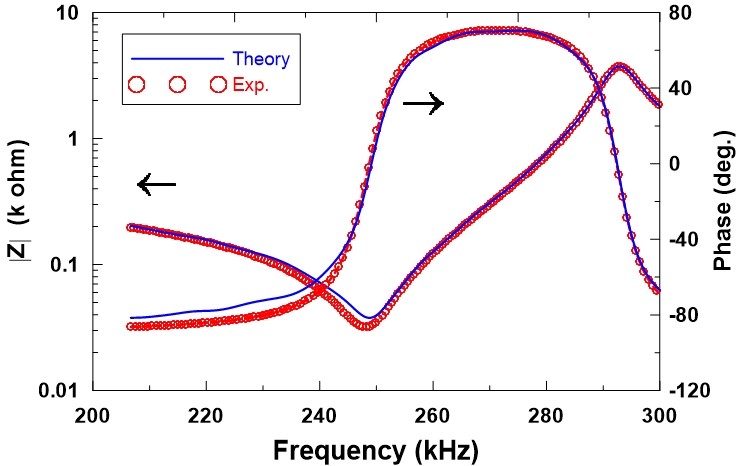

Supplement: Supplementary file 1 [file 8294acc6529698a3f5f3190b.docx]
